# Supplementary material
Source: publisher site journal article supplement (https://www.spandidos-publications.com/4449/downloadSupplementary)
Supplement: Supplementary file 1 [file downloadSupplementary]

## Sheet: FYCO1.kegggsea
Table SXV. The single-gene Gene Set Enrichment Analysis results for FYCO1 in the GSE40275 dataset
ID	Description	setSize	enrichmentScore	NES	pvalue	p.adjust	qvalues	rank	leading_edge	core_enrichment
hsa02010	ABC transporters	42	0.627941	2.00582	3.15506e-05	0.0099069	0.00883418	1557	tags=40%, list=19%, signal=33%	23461/10349/23460/10350/19/21/10257/6833/9619/5825/10057/215/10058/22/20/5826/368
hsa04110	Cell cycle	82	-0.511212	-1.80423	0.000169795	0.0266579	0.0237714	1122	tags=45%, list=13%, signal=39%	5591/891/7534/10393/1017/2932/7465/25847/3066/4087/9126/991/7529/64682/9134/1032/7532/994/995/5885/6502/8243/9232/990/5111/10971/1111/5347/8317/9133/993/890/699/5933/8900/898/701
hsa03440	Homologous recombination	20	-0.728867	-1.9555	0.000280928	0.0275241	0.0245438	1047	tags=50%, list=13%, signal=44%	5425/8438/672/675/10714/580/83990/5932/5888/7516
hsa00630	Glyoxylate and dicarboxylate metabolism	21	0.706454	1.94792	0.000384248	0.0275241	0.0245438	2031	tags=71%, list=24%, signal=54%	275/9380/55902/847/84532/50/6472/5096/5095/2731/48/125061/132158/6470/38
hsa05322	Systemic lupus erythematosus	40	-0.607798	-1.88069	0.000438281	0.0275241	0.0245438	1622	tags=45%, list=19%, signal=36%	3112/717/942/3108/715/718/712/3109/3122/714/2214/716/713/3127/3125/3126/3117/3123
hsa05150	Staphylococcus aureus infection	38	-0.612379	-1.8746	0.000582044	0.0304603	0.0271621	1622	tags=58%, list=19%, signal=47%	3112/717/5724/3108/715/718/712/3109/3426/3122/714/2213/719/2214/3075/716/713/3127/3125/3126/3117/3123
hsa03030	DNA replication	22	-0.681605	-1.84687	0.000913232	0.040965	0.0365293	1047	tags=59%, list=13%, signal=52%	5425/5985/5984/10535/5427/5426/2237/23649/10714/246243/5982/5111/5983
hsa04911	Insulin secretion	61	-0.522054	-1.76684	0.0010761	0.0422371	0.0376636	523	tags=21%, list=6%, signal=20%	478/109/775/9699/1131/5567/817/5332/481/23236/107/6616/27445
